# Supplementary material for: Closed-shell d 10 –d 10 mechanochromic [AuPh(CNPh)] n complex: quantum chemistry electronic and optical properties
Source: Royal Society of Chemistry journal article supplement (doi:10.1039/d3ra08935e), 2024-01-01
Supplement: d3ra08935e1.pdf [file d3ra08935e1.pdf]

## The Closed-Shell $d^{10}$ - $d^{10}$ Mechanochromic in $[\text{AuPh}(\text{CNPh})]_n$ Complex. Quantum Chemistry Electronic and Optical Properties

Fernando Mendizabal<sup>1\*</sup>, María Luisa Ceron<sup>\*2</sup>, Dina Lara<sup>1</sup>, and Sebastián Miranda-Rojas<sup>\*3,4</sup>

<sup>1</sup>Departamento de Química, Facultad de Ciencias, Universidad de Chile, Casilla 653, Santiago, Chile.

<sup>2</sup>Facultad de Ingeniería, Universidad Finis Terrae, Av. Pedro de Valdivia 1509, Providencia, Santiago, Chile

<sup>3</sup>Departamento de Ciencias Químicas, Facultad de Ciencias Exactas, Universidad Andrés Bello, Avenida República 275, Santiago, Chile. E-mail:sebastian.miranda@unab.cl

<sup>4</sup>Universidad Andrés Bello, Centro de Química Teórica & Computacional (CQT&C), Facultad de Ciencias Exactas, Departamento de Ciencias Químicas, Avenida República 275, 8370146, Santiago de Chile, Chile E-mail:sebastian.miranda@unab.cl

\*Correspondence: hagua@uchile.cl (F.M.), lceron@uft.cl (M.L.C), sebastian.miranda@unab.cl (S.M-R.)

### Figures

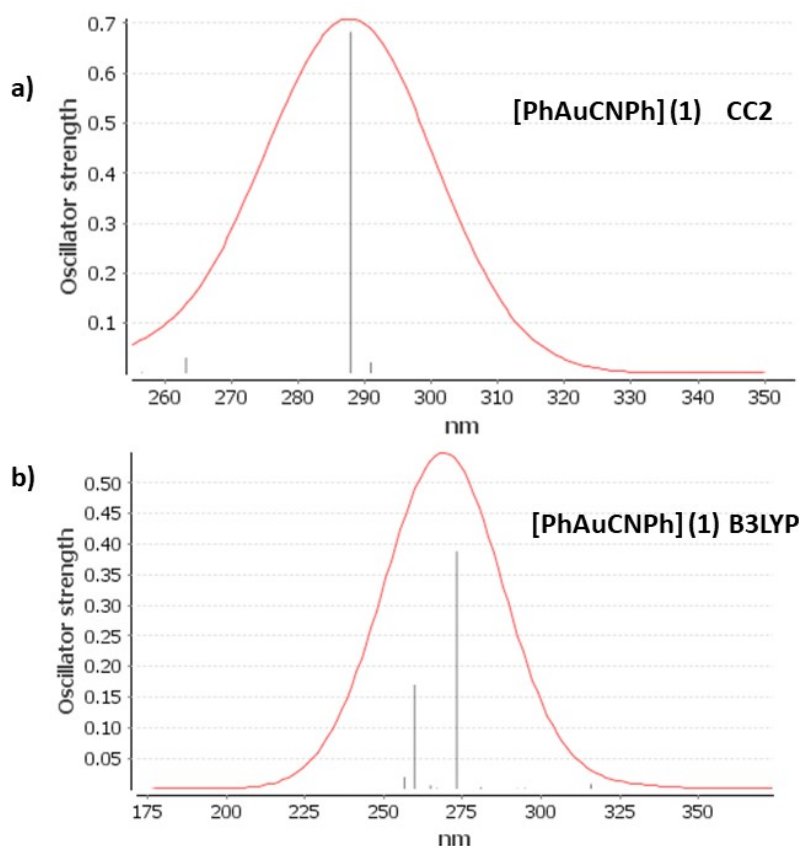

**Figure 1S.** Electronic spectra at the CC2 and B3LYP levels calculated for [PhAuCNPh] model 1.

CC2

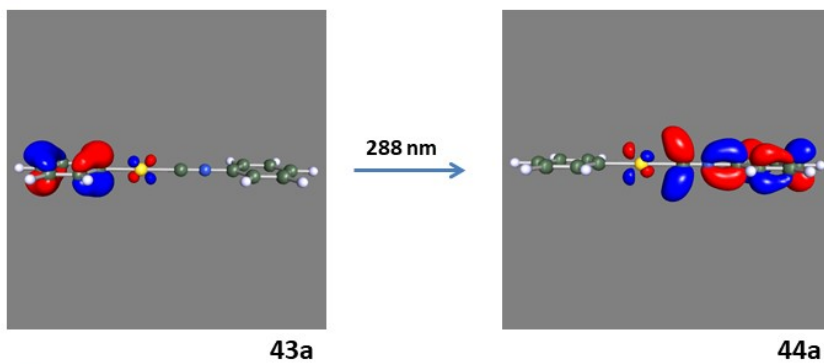

B3LYP

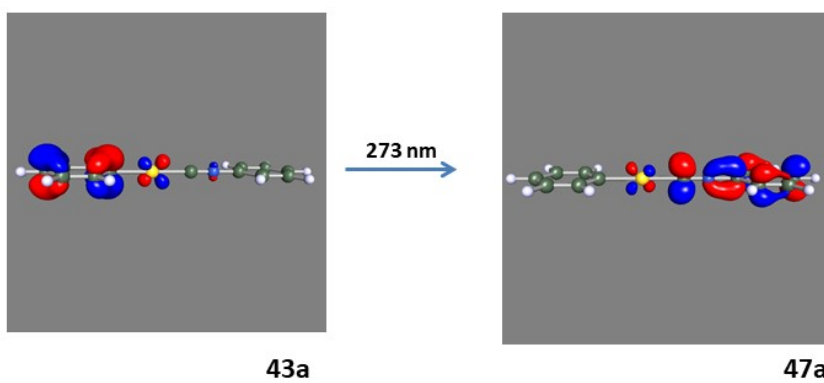

**Figure 2S.** Most important active molecular orbitals in the electronic transition of the [AuPh(CNPh)] (1) at the CC2 and B3LYP levels.
